# Supplementary material
Source: HighWire-hosted journal article supplement (https://www.canjsurg.ca/highwire/filestream/96739/field_highwire_adjunct_files/0/cjs-014515-1-at.pdf)
Supplement: cjs-014515-1-at.pdf [file cjs-014515-1-at.pdf]

**Appendix 1** to Kim C, Vassilyadi M, Forbes J, et al. Traumatic spinal injuries in children at a single level 1 pediatric trauma centre: report of a 23-year experience. *Can J Surg* 2016.

DOI: 10.1503/cjs. 014515

Copyright © 2016 The Author(s) or their employer(s).

To receive this resource in an accessible format, please contact us at [cmajgroup@cmaj.ca](mailto:cmajgroup@cmaj.ca).

*Online appendices are unedited and posted as supplied by the authors.*

### **ICD-10 Codes**

S22.0, S22.00, S22.01, S22.09, S22.1, S22.100, S22.101, S22.8, S22.800, S22.801, S22.9, S22.900, S22.901, S23, S23.0, S23.1, S23.2, S23.3, S23.4, S23.5, S24, S24.0, S24.1, S24.10, S24.11, S24.12, S24.13, S24.18, S24.19, S24.2, S24.20, S24.28, S30.8, S32, S32.0, S32.0, S32.00, S32.01, S32.02, S32.03, S32.04, S32.09, S32.1, S32.100, S32.101, S32.2, S32.200, S32.201, S32.7, S32.700, S32.701, S32.8, S32.800, S32.801, S33, S33.0, S33.1, S33.2, S33.3, S33.4, S33.5, S33.6, S33.7, S34, S34.0, S34.1, S34.10, S34.11, S34.12, S34.13, S34.18, S34.19, S34.2, S34.20, S34.28, S34.3, S34.30, S34.38, S34.4, S34.40, S34.48, S34.5, S34.50, S38.1, S38.3, S39, S39.0, S39.00, S39.08, S39.6, S39.7, S39.8, S39.9.
